# Supplementary material for: The Metabolic Fate of Deoxynivalenol and Its Acetylated Derivatives in a Wheat Suspension Culture: Identification and Detection of DON-15-O-Glucoside, 15-Acetyl-DON-3-O-Glucoside and 15-Acetyl-DON-3-Sulfate
Source: PubMed Central journal article supplement (PMC4549741; doi:10.3390/toxins7083112), 2015-08-12
Supplement: toxins-07-03112-s001.pdf [file toxins-07-03112-s001.pdf]

# Supplementary Materials

**Table S1.** All individual samples of wheat suspension culture assay according to section 3.2. LOD: limit of detection, ww: wet weight.

| Sample Type | Replicate | Time (h) | Toxin Added | DON ( $\mu\text{M}$ ) | D3G ( $\mu\text{M}$ ) | D3S ( $\mu\text{M}$ ) | D15S ( $\mu\text{M}$ ) | 3-ADON ( $\mu\text{M}$ ) | 15-ADON ( $\mu\text{M}$ ) | 15-ADON3G ( $\mu\text{M}$ ) | 15-ADON3S ( $\mu\text{M}$ ) | D15G ( $\mu\text{M}$ ) | 3,15-diADON ( $\mu\text{M}$ ) | DON-GSH (Peak Area) |
|-------------|-----------|----------|-------------|-----------------------|-----------------------|-----------------------|------------------------|--------------------------|---------------------------|-----------------------------|-----------------------------|------------------------|-------------------------------|---------------------|
| supernatant | 1         | 0        | 3-ADON      | 0.31                  | <LOD                  | <LOD                  | <LOD                   | 126                      | <LOD                      | <LOD                        | <LOD                        | <LOD                   | -                             | <LOD                |
| supernatant | 2         | 0        | 3-ADON      | 0.31                  | <LOD                  | <LOD                  | <LOD                   | 148                      | <LOD                      | <LOD                        | <LOD                        | <LOD                   | -                             | <LOD                |
| supernatant | 3         | 0        | 3-ADON      | 0.33                  | <LOD                  | <LOD                  | <LOD                   | 153                      | <LOD                      | <LOD                        | <LOD                        | <LOD                   | -                             | <LOD                |
| supernatant | 1         | 6        | 3-ADON      | 11.2                  | 0.21                  | <LOD                  | <LOD                   | 132                      | <LOD                      | <LOD                        | <LOD                        | <LOD                   | -                             | <LOD                |
| supernatant | 2         | 6        | 3-ADON      | 8.63                  | 0.21                  | <LOD                  | <LOD                   | 144                      | <LOD                      | <LOD                        | <LOD                        | <LOD                   | -                             | <LOD                |
| supernatant | 3         | 6        | 3-ADON      | 10.9                  | 0.22                  | <LOD                  | <LOD                   | 120                      | <LOD                      | <LOD                        | <LOD                        | <LOD                   | -                             | <LOD                |
| supernatant | 1         | 24       | 3-ADON      | 43.5                  | 0.54                  | <LOD                  | <LOD                   | 46.2                     | <LOD                      | <LOD                        | <LOD                        | <LOD                   | -                             | 2551                |
| supernatant | 2         | 24       | 3-ADON      | 38.7                  | 0.47                  | <LOD                  | <LOD                   | 59.2                     | <LOD                      | <LOD                        | <LOD                        | <LOD                   | -                             | 2251                |
| supernatant | 3         | 24       | 3-ADON      | 44.8                  | 0.59                  | <LOD                  | <LOD                   | 44.3                     | <LOD                      | <LOD                        | <LOD                        | <LOD                   | -                             | 2176                |
| supernatant | 1         | 48       | 3-ADON      | 61.3                  | 5.24                  | <LOD                  | <LOD                   | 15.5                     | <LOD                      | 0.02                        | <LOD                        | <LOD                   | -                             | 13430               |
| supernatant | 2         | 48       | 3-ADON      | 59.5                  | 4.40                  | <LOD                  | <LOD                   | 28.4                     | <LOD                      | 0.02                        | <LOD                        | <LOD                   | -                             | 11860               |
| supernatant | 3         | 48       | 3-ADON      | 63.0                  | 5.86                  | <LOD                  | <LOD                   | 16.9                     | <LOD                      | 0.02                        | <LOD                        | <LOD                   | -                             | 2926                |
| supernatant | 1         | 72       | 3-ADON      | 65.2                  | 12.6                  | 0.05                  | <LOD                   | 6.75                     | <LOD                      | 0.06                        | <LOD                        | 0.04                   | -                             | 14030               |
| supernatant | 2         | 72       | 3-ADON      | 67.7                  | 12.5                  | 0.05                  | <LOD                   | 15.2                     | <LOD                      | 0.05                        | <LOD                        | 0.03                   | -                             | 15080               |
| supernatant | 3         | 72       | 3-ADON      | 65.1                  | 12.2                  | 0.05                  | <LOD                   | 5.77                     | <LOD                      | 0.04                        | <LOD                        | 0.04                   | -                             | 12460               |
| supernatant | 1         | 96       | 3-ADON      | 67.8                  | 20.1                  | 0.08                  | <LOD                   | 3.25                     | <LOD                      | 0.09                        | <LOD                        | 0.10                   | -                             | 21460               |
| supernatant | 2         | 96       | 3-ADON      | 70.6                  | 24.0                  | 0.02                  | <LOD                   | 10.0                     | <LOD                      | 0.13                        | <LOD                        | <LOD                   | -                             | -                   |
| supernatant | 3         | 96       | 3-ADON      | 64.5                  | 19.6                  | 0.02                  | <LOD                   | 2.41                     | <LOD                      | 0.11                        | <LOD                        | <LOD                   | -                             | -                   |
| supernatant | 1         | 0        | 15-ADON     | 0.44                  | <LOD                  | <LOD                  | <LOD                   | 10.9                     | 195                       | 0.00                        | <LOD                        | <LOD                   | -                             | 150.1               |
| supernatant | 2         | 0        | 15-ADON     | 0.48                  | <LOD                  | <LOD                  | <LOD                   | 12.0                     | 187                       | 0.00                        | <LOD                        | <LOD                   | -                             | 75.05               |
| supernatant | 3         | 0        | 15-ADON     | 0.42                  | <LOD                  | <LOD                  | <LOD                   | 11.3                     | 174                       | 0.00                        | <LOD                        | <LOD                   | -                             | 150.1               |
| supernatant | 1         | 6        | 15-ADON     | 2.17                  | <LOD                  | <LOD                  | <LOD                   | 9.76                     | 170                       | 0.03                        | <LOD                        | <LOD                   | -                             | 225.1               |
| supernatant | 2         | 6        | 15-ADON     | 1.90                  | <LOD                  | <LOD                  | <LOD                   | 9.82                     | 168                       | 0.02                        | <LOD                        | <LOD                   | -                             | <LOD                |
| supernatant | 3         | 6        | 15-ADON     | 1.96                  | <LOD                  | <LOD                  | <LOD                   | 10.7                     | 160                       | 0.02                        | <LOD                        | <LOD                   | -                             | <LOD                |
| supernatant | 1         | 24       | 15-ADON     | 9.68                  | 0.29                  | <LOD                  | <LOD                   | 5.48                     | 104                       | 0.32                        | 0.00                        | <LOD                   | -                             | <LOD                |

Table S1. *Cont.*

| Sample Type | Replicate | Time (h) | Toxin Added | DON ( $\mu\text{M}$ ) | D3G ( $\mu\text{M}$ ) | D3S ( $\mu\text{M}$ ) | D15S ( $\mu\text{M}$ ) | 3-ADON ( $\mu\text{M}$ ) | 15-ADON ( $\mu\text{M}$ ) | 15-ADON3G ( $\mu\text{M}$ ) | 15-ADON3S ( $\mu\text{M}$ ) | D15G ( $\mu\text{M}$ ) | 3,15-diADON ( $\mu\text{M}$ ) | DON-GSH (Peak Area) |
|-------------|-----------|----------|-------------|-----------------------|-----------------------|-----------------------|------------------------|--------------------------|---------------------------|-----------------------------|-----------------------------|------------------------|-------------------------------|---------------------|
| supernatant | 2         | 24       | 15-ADON     | 8.94                  | 0.26                  | <LOD                  | <LOD                   | 6.41                     | 123                       | 0.23                        | 0.00                        | <LOD                   | -                             | 825.4               |
| supernatant | 3         | 24       | 15-ADON     | 8.64                  | 0.25                  | <LOD                  | <LOD                   | 7.65                     | 131                       | 0.22                        | 0.00                        | <LOD                   | -                             | 600.3               |
| supernatant | 1         | 48       | 15-ADON     | 14.9                  | 1.12                  | <LOD                  | <LOD                   | 3.15                     | 44.2                      | 3.26                        | 0.01                        | <LOD                   | -                             | 2101                |
| supernatant | 2         | 48       | 15-ADON     | 14.9                  | 1.04                  | <LOD                  | <LOD                   | 3.76                     | 47.1                      | 3.28                        | 0.00                        | <LOD                   | -                             | 2776                |
| supernatant | 3         | 48       | 15-ADON     | 14.6                  | 0.95                  | <LOD                  | <LOD                   | 3.19                     | 54.9                      | 2.61                        | 0.00                        | <LOD                   | -                             | 11330               |
| supernatant | 1         | 72       | 15-ADON     | 17.8                  | 2.30                  | <LOD                  | <LOD                   | 1.80                     | 19.5                      | 7.06                        | 0.01                        | 0.01                   | -                             | 3827                |
| supernatant | 2         | 72       | 15-ADON     | 18.1                  | 2.12                  | <LOD                  | <LOD                   | 2.09                     | 27.7                      | 6.40                        | 0.01                        | <LOD                   | -                             | 2701                |
| supernatant | 3         | 72       | 15-ADON     | 18.7                  | 2.33                  | <LOD                  | <LOD                   | 2.81                     | 32.2                      | 7.15                        | 0.01                        | <LOD                   | -                             | 2626                |
| supernatant | 1         | 96       | 15-ADON     | 18.3                  | 3.74                  | <LOD                  | <LOD                   | 1.06                     | 11.7                      | 10.1                        | 0.01                        | 0.02                   | -                             | 4427                |
| supernatant | 2         | 96       | 15-ADON     | 18.7                  | 3.09                  | <LOD                  | <LOD                   | 0.80                     | 18.7                      | 9.82                        | <LOD                        | <LOD                   | -                             | -                   |
| supernatant | 3         | 96       | 15-ADON     | 20.2                  | 3.51                  | <LOD                  | <LOD                   | 1.28                     | 28.9                      | 11.4                        | <LOD                        | <LOD                   | -                             | -                   |
| supernatant | 1         | 0        | 3,15-diADON | 0.08                  | <LOD                  | <LOD                  | <LOD                   | 0.57                     | 0.79                      | <LOD                        | <LOD                        | <LOD                   | 188                           | <LOD                |
| supernatant | 2         | 0        | 3,15-diADON | 0.12                  | <LOD                  | <LOD                  | <LOD                   | 0.54                     | 2.73                      | <LOD                        | <LOD                        | <LOD                   | 195                           | <LOD                |
| supernatant | 3         | 0        | 3,15-diADON | 0.05                  | <LOD                  | <LOD                  | <LOD                   | 0.47                     | 1.04                      | <LOD                        | <LOD                        | <LOD                   | 131                           | <LOD                |
| supernatant | 1         | 6        | 3,15-diADON | 2.18                  | <LOD                  | <LOD                  | <LOD                   | 6.97                     | 12.1                      | <LOD                        | <LOD                        | <LOD                   | 105                           | <LOD                |
| supernatant | 2         | 6        | 3,15-diADON | 2.21                  | <LOD                  | <LOD                  | <LOD                   | 7.29                     | 13.0                      | <LOD                        | <LOD                        | <LOD                   | 117                           | <LOD                |
| supernatant | 3         | 6        | 3,15-diADON | 3.06                  | <LOD                  | <LOD                  | <LOD                   | 8.63                     | 17.0                      | <LOD                        | <LOD                        | <LOD                   | 108                           | <LOD                |
| supernatant | 1         | 24       | 3,15-diADON | 14.7                  | 0.09                  | <LOD                  | <LOD                   | 14.9                     | 21.5                      | 0.09                        | <LOD                        | <LOD                   | 54.0                          | <LOD                |
| supernatant | 2         | 24       | 3,15-diADON | 14.6                  | 0.08                  | <LOD                  | <LOD                   | 16.0                     | 26.7                      | 0.11                        | <LOD                        | <LOD                   | 70.2                          | <LOD                |
| supernatant | 3         | 24       | 3,15-diADON | 14.6                  | 0.08                  | <LOD                  | <LOD                   | 13.0                     | 19.4                      | 0.09                        | <LOD                        | <LOD                   | 43.2                          | 157.1               |
| supernatant | 1         | 48       | 3,15-diADON | 24.0                  | 0.81                  | <LOD                  | <LOD                   | 10.4                     | 15.5                      | 1.00                        | <LOD                        | <LOD                   | 16.2                          | 391.9               |
| supernatant | 2         | 48       | 3,15-diADON | 22.5                  | 0.70                  | <LOD                  | <LOD                   | 11.1                     | 16.6                      | 1.01                        | <LOD                        | <LOD                   | 20.1                          | 471.4               |
| supernatant | 3         | 48       | 3,15-diADON | 23.7                  | 0.65                  | <LOD                  | <LOD                   | 7.94                     | 11.7                      | 0.84                        | <LOD                        | <LOD                   | 9.66                          | <LOD                |
| supernatant | 1         | 72       | 3,15-diADON | 24.5                  | 1.51                  | <LOD                  | <LOD                   | 4.79                     | 6.17                      | 1.84                        | <LOD                        | <LOD                   | 3.68                          | <LOD                |
| supernatant | 2         | 72       | 3,15-diADON | 23.2                  | 1.48                  | <LOD                  | <LOD                   | 5.61                     | 8.17                      | 1.96                        | <LOD                        | <LOD                   | 4.40                          | <LOD                |



Table S1. *Cont.*

| Sample Type | Replicate | Time (h) | Toxin Added | DON ( $\mu\text{mol}/\text{kg ww}$ ) | D3G ( $\mu\text{mol}/\text{kg ww}$ ) | D3S ( $\mu\text{mol}/\text{kg ww}$ ) | D15S ( $\mu\text{mol}/\text{kg ww}$ ) | 3-ADON ( $\mu\text{mol}/\text{kg ww}$ ) | 15-ADON ( $\mu\text{mol}/\text{kg ww}$ ) | 15-ADON3G ( $\mu\text{mol}/\text{kg ww}$ ) | 15-ADON3S ( $\mu\text{mol}/\text{kg ww}$ ) | D15G ( $\mu\text{mol}/\text{kg ww}$ ) | 3,15-diADON ( $\mu\text{mol}/\text{kg ww}$ ) | DON-GSH (Peak Area) |
|-------------|-----------|----------|-------------|--------------------------------------|--------------------------------------|--------------------------------------|---------------------------------------|-----------------------------------------|------------------------------------------|--------------------------------------------|--------------------------------------------|---------------------------------------|----------------------------------------------|---------------------|
| extract     | 1         | 0        | 3-ADON      | 8.38                                 | 1.44                                 | <LOD                                 | <LOD                                  | 11.6                                    | <LOD                                     | 0.05                                       | <LOD                                       | <LOD                                  | -                                            | 2701                |
| extract     | 2         | 0        | 3-ADON      | 6.63                                 | 1.16                                 | <LOD                                 | <LOD                                  | 11.2                                    | <LOD                                     | 0.05                                       | <LOD                                       | <LOD                                  | -                                            | 1726                |
| extract     | 3         | 0        | 3-ADON      | 6.01                                 | 1.24                                 | <LOD                                 | <LOD                                  | 11.3                                    | <LOD                                     | 0.04                                       | <LOD                                       | <LOD                                  | -                                            | 1951                |
| extract     | 1         | 6        | 3-ADON      | 48.3                                 | 34.9                                 | 0.20                                 | <LOD                                  | 23.8                                    | <LOD                                     | 0.19                                       | <LOD                                       | 0.13                                  | -                                            | 118800              |
| extract     | 2         | 6        | 3-ADON      | 42.8                                 | 35.6                                 | 0.18                                 | <LOD                                  | 20.4                                    | <LOD                                     | 0.17                                       | <LOD                                       | 0.10                                  | -                                            | 120700              |
| extract     | 3         | 6        | 3-ADON      | 54.0                                 | 41.8                                 | 0.21                                 | <LOD                                  | 26.2                                    | <LOD                                     | 0.23                                       | <LOD                                       | 0.08                                  | -                                            | 165900              |
| extract     | 1         | 24       | 3-ADON      | 25.8                                 | 150                                  | 0.56                                 | <LOD                                  | 5.78                                    | <LOD                                     | 0.58                                       | <LOD                                       | 0.61                                  | -                                            | 331900              |
| extract     | 2         | 24       | 3-ADON      | 25.7                                 | 149                                  | 0.53                                 | <LOD                                  | 8.28                                    | <LOD                                     | 0.45                                       | <LOD                                       | 0.41                                  | -                                            | 385700              |
| extract     | 3         | 24       | 3-ADON      | 19.6                                 | 161                                  | 0.65                                 | <LOD                                  | 4.77                                    | <LOD                                     | 0.61                                       | <LOD                                       | 0.28                                  | -                                            | 327700              |
| extract     | 1         | 48       | 3-ADON      | 17.7                                 | 296                                  | 0.92                                 | <LOD                                  | 2.07                                    | <LOD                                     | 1.20                                       | <LOD                                       | 1.24                                  | -                                            | 372600              |
| extract     | 2         | 48       | 3-ADON      | 17.9                                 | 324                                  | 0.92                                 | <LOD                                  | 3.13                                    | <LOD                                     | 1.04                                       | <LOD                                       | 1.00                                  | -                                            | 391300              |
| extract     | 3         | 48       | 3-ADON      | 16.8                                 | 284                                  | 1.08                                 | <LOD                                  | 2.31                                    | <LOD                                     | 2.02                                       | <LOD                                       | 1.03                                  | -                                            | 124100              |
| extract     | 1         | 72       | 3-ADON      | 7.38                                 | 137                                  | 0.42                                 | <LOD                                  | 0.59                                    | <LOD                                     | 0.75                                       | <LOD                                       | 0.47                                  | -                                            | 146600              |
| extract     | 2         | 72       | 3-ADON      | 12.8                                 | 311                                  | 1.02                                 | <LOD                                  | 1.88                                    | <LOD                                     | 1.40                                       | <LOD                                       | 0.96                                  | -                                            | 349000              |
| extract     | 3         | 72       | 3-ADON      | 8.34                                 | 184                                  | 0.56                                 | <LOD                                  | 0.57                                    | <LOD                                     | 0.99                                       | <LOD                                       | 0.56                                  | -                                            | 173900              |
| extract     | 1         | 96       | 3-ADON      | 10.9                                 | 217                                  | 0.72                                 | <LOD                                  | 0.54                                    | <LOD                                     | 1.21                                       | <LOD                                       | 0.74                                  | -                                            | 171000              |
| extract     | 1         | 0        | 15-ADON     | 2.78                                 | 0.97                                 | <LOD                                 | <LOD                                  | 1.39                                    | 20.0                                     | 6.97                                       | 0.02                                       | <LOD                                  | -                                            | 900.5               |
| extract     | 2         | 0        | 15-ADON     | 3.23                                 | 1.00                                 | <LOD                                 | <LOD                                  | 1.92                                    | 23.0                                     | 6.36                                       | 0.01                                       | <LOD                                  | -                                            | 1201                |
| extract     | 3         | 0        | 15-ADON     | 2.21                                 | 0.79                                 | <LOD                                 | <LOD                                  | 1.19                                    | 13.1                                     | 5.04                                       | 0.01                                       | <LOD                                  | -                                            | 975.4               |
| extract     | 1         | 6        | 15-ADON     | 10.6                                 | 7.27                                 | <LOD                                 | <LOD                                  | 1.60                                    | 16.6                                     | 35.6                                       | 0.04                                       | <LOD                                  | -                                            | 26410               |
| extract     | 2         | 6        | 15-ADON     | 10.0                                 | 7.69                                 | <LOD                                 | <LOD                                  | 1.46                                    | 18.6                                     | 36.8                                       | 0.04                                       | 0.07                                  | -                                            | 18830               |
| extract     | 3         | 6        | 15-ADON     | 11.6                                 | 9.10                                 | <LOD                                 | <LOD                                  | 1.55                                    | 17.3                                     | 42.3                                       | 0.05                                       | 0.07                                  | -                                            | 26940               |
| extract     | 1         | 24       | 15-ADON     | 8.69                                 | 43.4                                 | 0.21                                 | <LOD                                  | 0.80                                    | 9.31                                     | 107                                        | 0.09                                       | 0.05                                  | -                                            | 102000              |
| extract     | 2         | 24       | 15-ADON     | 8.80                                 | 46.8                                 | 0.15                                 | <LOD                                  | 0.70                                    | 8.19                                     | 97.3                                       | 0.10                                       | 0.30                                  | -                                            | 98670               |
| extract     | 3         | 24       | 15-ADON     | 7.34                                 | 33.1                                 | 0.15                                 | <LOD                                  | 0.58                                    | 7.01                                     | 91.7                                       | 0.06                                       | 0.26                                  | -                                            | 100900              |
| extract     | 1         | 48       | 15-ADON     | 7.62                                 | 79.2                                 | 0.27                                 | <LOD                                  | 0.31                                    | 4.76                                     | 167                                        | 0.12                                       | 0.26                                  | -                                            | 126500              |

Table S1. *Cont.*

| Sample Type | Replicate | Time (h) | Toxin Added | DON ( $\mu\text{mol}/\text{kg ww}$ ) | D3G ( $\mu\text{mol}/\text{kg ww}$ ) | D3S ( $\mu\text{mol}/\text{kg ww}$ ) | D15S ( $\mu\text{mol}/\text{kg ww}$ ) | 3-ADON ( $\mu\text{mol}/\text{kg ww}$ ) | 15-ADON ( $\mu\text{mol}/\text{kg ww}$ ) | 15-ADON3G ( $\mu\text{mol}/\text{kg ww}$ ) | 15-ADON3S ( $\mu\text{mol}/\text{kg ww}$ ) | D15G ( $\mu\text{mol}/\text{kg ww}$ ) | 3,15-diADON ( $\mu\text{mol}/\text{kg ww}$ ) | DON-GSH (Peak Area) |
|-------------|-----------|----------|-------------|--------------------------------------|--------------------------------------|--------------------------------------|---------------------------------------|-----------------------------------------|------------------------------------------|--------------------------------------------|--------------------------------------------|---------------------------------------|----------------------------------------------|---------------------|
| extract     | 2         | 48       | 15-ADON     | 6.55                                 | 76.6                                 | 0.24                                 | <LOD                                  | 0.30                                    | 5.79                                     | 156                                        | 0.08                                       | 0.26                                  | -                                            | 120100              |
| extract     | 3         | 48       | 15-ADON     | 6.17                                 | 83.4                                 | 0.24                                 | <LOD                                  | 0.21                                    | 0.00                                     | 163                                        | 0.11                                       | 0.23                                  | -                                            | 465300              |
| extract     | 1         | 72       | 15-ADON     | 3.88                                 | 85.3                                 | 0.42                                 | <LOD                                  | 0.12                                    | 4.41                                     | 173                                        | 0.13                                       | 0.29                                  | -                                            | 94650               |
| extract     | 2         | 72       | 15-ADON     | 3.50                                 | 84.0                                 | 0.24                                 | <LOD                                  | 0.12                                    | 2.02                                     | 146                                        | 0.09                                       | 0.29                                  | -                                            | 95280               |
| extract     | 3         | 72       | 15-ADON     | 4.08                                 | 79.0                                 | 0.20                                 | <LOD                                  | 0.17                                    | 1.52                                     | 141                                        | 0.09                                       | 0.00                                  | -                                            | 81280               |
| extract     | 1         | 96       | 15-ADON     | 2.92                                 | 79.5                                 | 0.29                                 | <LOD                                  | 0.10                                    | 0.00                                     | 163                                        | 0.10                                       | 0.00                                  | -                                            | 55260               |
| extract     | 1         | 0        | 3,15-diADON | 0.48                                 | 0.14                                 | <LOD                                 | <LOD                                  | 0.84                                    | 1.17                                     | 0.95                                       | <LOD                                       | <LOD                                  | 17.6                                         | 314.1               |
| extract     | 2         | 0        | 3,15-diADON | 0.54                                 | 0.16                                 | <LOD                                 | <LOD                                  | 0.83                                    | 1.24                                     | 0.96                                       | <LOD                                       | <LOD                                  | 19.4                                         | <LOD                |
| extract     | 3         | 0        | 3,15-diADON | 0.48                                 | 0.11                                 | <LOD                                 | <LOD                                  | 0.78                                    | 1.45                                     | 0.87                                       | <LOD                                       | <LOD                                  | 18.0                                         | <LOD                |
| extract     | 1         | 6        | 3,15-diADON | 8.15                                 | 10.9                                 | 0.03                                 | <LOD                                  | 1.51                                    | 2.48                                     | 26.7                                       | 0.02                                       | <LOD                                  | 12.5                                         | 43900               |
| extract     | 2         | 6        | 3,15-diADON | 8.47                                 | 9.43                                 | 0.02                                 | <LOD                                  | 1.71                                    | 2.39                                     | 20.6                                       | 0.02                                       | <LOD                                  | 16.1                                         | 29980               |
| extract     | 3         | 6        | 3,15-diADON | 9.32                                 | 13.0                                 | 0.03                                 | <LOD                                  | 1.84                                    | 1.76                                     | 27.3                                       | 0.02                                       | <LOD                                  | 14.8                                         | 41160               |
| extract     | 1         | 24       | 3,15-diADON | 8.01                                 | 39.0                                 | 0.08                                 | <LOD                                  | 1.25                                    | 1.54                                     | 54.2                                       | 0.03                                       | <LOD                                  | 3.73                                         | 110200              |
| extract     | 2         | 24       | 3,15-diADON | 7.46                                 | 57.1                                 | 0.13                                 | <LOD                                  | 1.65                                    | 2.67                                     | 76.0                                       | 0.04                                       | <LOD                                  | 5.98                                         | 141500              |
| extract     | 3         | 24       | 3,15-diADON | 6.52                                 | 51.4                                 | 0.11                                 | <LOD                                  | 1.22                                    | 2.51                                     | 59.3                                       | 0.03                                       | <LOD                                  | 4.29                                         | 92670               |
| extract     | 1         | 48       | 3,15-diADON | 5.79                                 | 80.0                                 | 0.17                                 | <LOD                                  | 0.85                                    | 1.34                                     | 76.0                                       | 0.03                                       | <LOD                                  | <LOD                                         | 106200              |
| extract     | 2         | 48       | 3,15-diADON | 5.43                                 | 89.5                                 | 0.14                                 | <LOD                                  | 1.05                                    | 1.01                                     | 87.4                                       | 0.04                                       | <LOD                                  | <LOD                                         | 110100              |
| extract     | 3         | 48       | 3,15-diADON | 4.18                                 | 86.9                                 | 0.14                                 | <LOD                                  | 0.65                                    | 0.86                                     | 90.0                                       | 0.03                                       | <LOD                                  | <LOD                                         | 146400              |
| extract     | 1         | 72       | 3,15-diADON | 3.73                                 | 105                                  | 0.17                                 | <LOD                                  | 0.47                                    | 0.41                                     | 95.2                                       | 0.05                                       | <LOD                                  | <LOD                                         | 97860               |
| extract     | 2         | 72       | 3,15-diADON | 4.04                                 | 133                                  | 0.23                                 | <LOD                                  | 0.56                                    | <LOD                                     | 118                                        | 0.05                                       | <LOD                                  | <LOD                                         | 153600              |
| extract     | 3         | 72       | 3,15-diADON | 2.54                                 | 97.9                                 | 0.16                                 | <LOD                                  | 0.27                                    | <LOD                                     | 84.0                                       | 0.04                                       | <LOD                                  | <LOD                                         | 95720               |
| extract     | 1         | 96       | 3,15-diADON | 2.37                                 | 110                                  | 0.21                                 | <LOD                                  | 0.21                                    | <LOD                                     | 86.6                                       | 0.04                                       | <LOD                                  | <LOD                                         | 70180               |
| extract     | 1         | 0        | DON         | 11.5                                 | <LOD                                 | <LOD                                 | <LOD                                  | <LOD                                    | <LOD                                     | 0.03                                       | <LOD                                       | <LOD                                  | <LOD                                         | 3535                |
| extract     | 2         | 0        | DON         | 7.62                                 | <LOD                                 | <LOD                                 | <LOD                                  | <LOD                                    | <LOD                                     | 0.04                                       | <LOD                                       | <LOD                                  | <LOD                                         | 1334                |
| extract     | 3         | 0        | DON         | 5.15                                 | <LOD                                 | <LOD                                 | <LOD                                  | <LOD                                    | <LOD                                     | 0.03                                       | <LOD                                       | <LOD                                  | <LOD                                         | 942.5               |
| extract     | 1         | 6        | DON         | 11.6                                 | 6.24                                 | <LOD                                 | <LOD                                  | <LOD                                    | <LOD                                     | 0.07                                       | <LOD                                       | <LOD                                  | <LOD                                         | 76.07               |

Table S1. *Cont.*

| Sample Type | Replicate | Time (h) | Toxin Added | DON<br>( $\mu\text{mol}/\text{kg ww}$ ) | D3G<br>( $\mu\text{mol}/\text{kg ww}$ ) | D3S<br>( $\mu\text{mol}/\text{kg ww}$ ) | D15S<br>( $\mu\text{mol}/\text{kg ww}$ ) | 3-ADON<br>( $\mu\text{mol}/\text{kg ww}$ ) | 15-ADON<br>( $\mu\text{mol}/\text{kg ww}$ ) | 15-ADON3G<br>( $\mu\text{mol}/\text{kg ww}$ ) | 15-ADON3S<br>( $\mu\text{mol}/\text{kg ww}$ ) | D15G<br>( $\mu\text{mol}/\text{kg ww}$ ) | 3,15-diADON<br>( $\mu\text{mol}/\text{kg ww}$ ) | DON-GSH<br>(Peak Area) |
|-------------|-----------|----------|-------------|-----------------------------------------|-----------------------------------------|-----------------------------------------|------------------------------------------|--------------------------------------------|---------------------------------------------|-----------------------------------------------|-----------------------------------------------|------------------------------------------|-------------------------------------------------|------------------------|
| extract     | 2         | 6        | DON         | 9.30                                    | 4.66                                    | <LOD                                    | <LOD                                     | <LOD                                       | <LOD                                        | 0.06                                          | <LOD                                          | <LOD                                     | <LOD                                            | <LOD                   |
| extract     | 3         | 6        | DON         | 10.2                                    | 5.57                                    | <LOD                                    | <LOD                                     | <LOD                                       | <LOD                                        | 0.08                                          | <LOD                                          | <LOD                                     | <LOD                                            | 69460                  |
| extract     | 1         | 24       | DON         | 9.84                                    | 22.0                                    | <LOD                                    | <LOD                                     | <LOD                                       | <LOD                                        | 0.14                                          | <LOD                                          | <LOD                                     | <LOD                                            | 89080                  |
| extract     | 2         | 24       | DON         | 7.71                                    | 16.0                                    | <LOD                                    | <LOD                                     | <LOD                                       | <LOD                                        | 0.08                                          | <LOD                                          | <LOD                                     | <LOD                                            | 84610                  |
| extract     | 3         | 24       | DON         | 11.2                                    | 24.4                                    | <LOD                                    | <LOD                                     | <LOD                                       | <LOD                                        | 0.12                                          | <LOD                                          | <LOD                                     | <LOD                                            | 170500                 |
| extract     | 1         | 48       | DON         | 9.52                                    | 40.0                                    | <LOD                                    | <LOD                                     | <LOD                                       | <LOD                                        | 0.21                                          | <LOD                                          | <LOD                                     | <LOD                                            | 174700                 |
| extract     | 2         | 48       | DON         | 9.28                                    | 39.8                                    | <LOD                                    | <LOD                                     | <LOD                                       | <LOD                                        | 0.17                                          | <LOD                                          | <LOD                                     | <LOD                                            | 114500                 |
| extract     | 3         | 48       | DON         | 10.4                                    | 44.0                                    | 0.02                                    | <LOD                                     | <LOD                                       | <LOD                                        | 0.20                                          | <LOD                                          | <LOD                                     | <LOD                                            | 131800                 |
| extract     | 1         | 72       | DON         | 9.12                                    | 64.9                                    | <LOD                                    | <LOD                                     | <LOD                                       | <LOD                                        | 0.36                                          | <LOD                                          | <LOD                                     | <LOD                                            | 147400                 |
| extract     | 2         | 72       | DON         | 10.1                                    | 62.1                                    | <LOD                                    | <LOD                                     | <LOD                                       | <LOD                                        | 0.26                                          | <LOD                                          | <LOD                                     | <LOD                                            | 131400                 |
| extract     | 3         | 72       | DON         | 7.94                                    | 59.2                                    | 0.02                                    | <LOD                                     | <LOD                                       | <LOD                                        | 0.24                                          | <LOD                                          | <LOD                                     | <LOD                                            | 132100                 |
| extract     | 1         | 96       | DON         | 8.82                                    | 80.5                                    | 0.02                                    | <LOD                                     | <LOD                                       | <LOD                                        | 0.37                                          | <LOD                                          | <LOD                                     | <LOD                                            | 121500                 |
